# Supplementary material for: Structural Brain Volumes of Individuals at Clinical High Risk for Psychosis: A Meta-analysis
Source: PubMed Central journal article supplement (PMC9616363; doi:10.1016/j.bpsgos.2021.09.002), 2021-09-30
Supplement: mmc1.pdf [file mmc1.pdf]

# **Structural Brain Volumes of Individuals at Clinical High Risk for Psychosis: A Meta-analysis**

## ***Supplementary Information***

Table S1 - Characteristics in individual study samples

Figure S2 - Forest plot of effect sizes of studies reporting on amygdala in CHR and HC subjects

Figure S3 - Forest plot of effect sizes of studies reporting on cerebrospinal fluid volume in CHR and HC subjects

Figure S4 - Forest plot of effect sizes of studies reporting on gray matter volume in CHR and HC subjects

Figure S5 - Forest plot of effect sizes of studies reporting on hippocampus volume in CHR and HC subjects

Figure S6 - Forest plot of effect sizes of studies reporting on left hippocampus volume in CHR and HC subjects

Figure S7 - Forest plot of effect sizes of studies reporting on right hippocampus volume in CHR and HC subjects

Figure S8 - Forest plot of effect sizes of studies reporting on superior temporal gyrus volume in CHR and HC subjects

Figure S9 - Forest plot of effect sizes of studies reporting on left superior temporal gyrus volume in CHR and HC subjects

Figure S10 - Forest plot of effect sizes of studies reporting on right superior temporal gyrus volume in CHR and HC subjects

Figure S11 - Forest plot of effect sizes of studies reporting on total intracranial volume in CHR and HC subjects

Figure S12 - Forest plot of effect sizes of studies reporting on lateral ventricles volume in CHR and HC subjects

Figure S13 - Forest plot of effect sizes of studies reporting on whole brain volume in CHR and HC subjects

Figure S14 - Forest plot of effect sizes of studies reporting on white brain volume in CHR and HC subjects

Figure S15 - Forest plot of effect sizes of studies reporting on cerebrospinal fluid volume in CHR-NT and CHR-T subjects

Figure S16 - Forest plot of effect sizes of studies reporting on gray matter volume in CHR-NT and CHR-T subjects

Figure S17 - Forest plot of effect sizes of studies reporting on hippocampus volume in CHR-NT and CHR-T subjects

Figure S18 - Forest plot of effect sizes of studies reporting on left hippocampus volume in CHR-NT and CHR-T subjects

Figure S19 - Forest plot of effect sizes of studies reporting on right hippocampus volume in CHR-NT and CHR-T subjects

Figure S20 - Forest plot of effect sizes of studies reporting on total intracranial volume in CHR-NT and CHR-T subjects

Figure S21 - Forest plot of effect sizes of studies reporting on lateral ventricles volume in CHR-NT and CHR-T subjects

Figure S22 - Forest plot of effect sizes of studies reporting on whole brain volume in CHR-NT and CHR-T subjects

Figure S23 - Forest plot of effect sizes of studies reporting on white matter volume in CHR-NT and CHR-T subjects

Supplemental References

Table S1. Studies included in the meta-analyses

| Study                                                                                                                                                    |                        | Study reference | N <sub>and diagnosis</sub>                  | Sex (% males)                | Age (years ± SD)                                     | Included brain regions                                                                                                                                                                                                                                                                                                                                                                                                                                                                 | Quality score STROBE checklist |
|----------------------------------------------------------------------------------------------------------------------------------------------------------|------------------------|-----------------|---------------------------------------------|------------------------------|------------------------------------------------------|----------------------------------------------------------------------------------------------------------------------------------------------------------------------------------------------------------------------------------------------------------------------------------------------------------------------------------------------------------------------------------------------------------------------------------------------------------------------------------------|--------------------------------|
| Amygdala subnucleus volumes in psychosis high-risk state and first episode psychosis                                                                     | Armio et al, 2020      | [1]             | 45 CHR<br>76 HC                             | 56 %<br>43 %                 | 25.8 ± 6.1<br>27.1 ± 4.9                             | CHR versus HC: amygdala, total intracranial volume                                                                                                                                                                                                                                                                                                                                                                                                                                     | 26                             |
| Regional Gray Matter Volume Abnormalities in the At Risk Mental State                                                                                    | Borgwardt et al, 2007  | [2]             | 35 CHR<br>22 HC<br>12 CHR-T<br>23 CHR-NT    | 63 %<br>59 %<br>75 %<br>57 % | 23.7 ± 5.6<br>23 ± 4.3<br>24.6 ± 5.3<br>23.3 ± 5.8   | CHR versus HC: total intracranial volume<br><br>CHR-T versus CHR-NT: total intracranial volume                                                                                                                                                                                                                                                                                                                                                                                         | 23                             |
| Hippocampus abnormalities in at risk mental states for psychosis? A cross-sectional high resolution region of interest magnetic resonance imaging study  | Buehlmann et al, 2010  | [3]             | 37 CHR<br>22 HC<br>16 CHR-T<br>21 CHR-NT    | 59 %<br>59 %<br>69 %<br>52 % | 24.7 ± 5.6<br>23 ± 4.3<br>26.4 ± 6.5<br>23.4 ± 6     | CHR versus HC: left hippocampus, right hippocampus, total hippocampus, whole brain<br><br>CHR-T versus CHR-NT: left hippocampus, right hippocampus, total hippocampus, whole brain                                                                                                                                                                                                                                                                                                     | 24                             |
| Cortical abnormalities in youth at clinical high-risk for psychosis: Findings from the NAPLS2 cohort                                                     | Chung et al, 2019      | [4]             | 274 CHR<br>134 HC<br>35 CHR-T<br>239 CHR-NT | 62 %<br>54 %<br>71 %<br>61 % | 19.6 ± 4.2<br>20.5 ± 4.6<br>18.8 ± 3.8<br>19.7 ± 4.2 | CHR versus HC: cerebrospinal fluid, gray matter, lateral ventricles, left hippocampus, right hippocampus, total hippocampus, left superior temporal gyrus, right superior temporal gyrus, total superior temporal gyrus, whole brain, total intracranial volume, white matter, amygdala<br><br>CHR-T versus CHR-NT: cerebrospinal fluid, gray matter, lateral ventricles, left hippocampus, right hippocampus, total hippocampus, total intracranial volume, whole brain, white matter | 27                             |
| Disorganized Gyrfication Network Properties During the Transition to Psychosis                                                                           | Das et al, 2018        | [5]             | 79 CHR<br>44 HC                             | 72 %<br>39 %                 | 24.3 ± 5.1<br>23 ± 4.3                               | CHR versus HC: total intracranial volume                                                                                                                                                                                                                                                                                                                                                                                                                                               | 22                             |
| Hippocampal Shape Abnormalities Predict Symptom Progression in Neuroleptic-Free Youth at Ultrahigh Risk for Psychosis                                    | Dean et al, 2016       | [6]             | 38 CHR<br>42 HC                             | 50 %<br>58 %                 | 18.9 ± 1.4<br>18.7 ± 1.9                             | CHR versus HC: left hippocampus, right hippocampus, total hippocampus,                                                                                                                                                                                                                                                                                                                                                                                                                 | 27                             |
| Structural and functional alterations in the brain during working memory in medication-naive patients at clinical high-risk for psychosis                | Gisselgard et al, 2018 | [7]             | 41 CHR<br>37 HC                             | 49 %<br>39 %                 | 16.7 ± 2.4<br>16.9 ± 3                               | CHR versus HC: left hippocampus, right hippocampus, total hippocampus, total intracranial volume                                                                                                                                                                                                                                                                                                                                                                                       | 24                             |
| Reduced volume in the anterior internal capsule but its maintained correlation with the frontal gray matter in subjects at ultra-high risk for psychosis | Han et al, 2012        | [8]             | 43 CHR<br>42 HC                             | 58%<br>62%                   | 22.4 ± 4<br>22.8 ± 3.6                               | CHR versus HC: total intracranial volume                                                                                                                                                                                                                                                                                                                                                                                                                                               | 22                             |

|                                                                                                                                                                                       |                           |      |                                          |                              |                                                      |                                                                                                                                                                                                |    |
|---------------------------------------------------------------------------------------------------------------------------------------------------------------------------------------|---------------------------|------|------------------------------------------|------------------------------|------------------------------------------------------|------------------------------------------------------------------------------------------------------------------------------------------------------------------------------------------------|----|
| Caudate nucleus volume in individuals at ultra-high risk of psychosis: a cross-sectional magnetic resonance imaging study                                                             | Hannan et al, 2010        | [9]  | 78 CHR<br>39 HC<br>39 CHR-T<br>19 CHR-NT | 62%<br>62%<br>62%<br>65%     | 19.2 ± 3.3<br>20 ± 3.2<br>19.4 ± 3.3<br>19 ± 3.3     | CHR versus HC: lateral ventricles, whole brain<br><br>CHR-T versus CHR-NT: lateral ventricles, whole brain, total intracranial volume                                                          | 24 |
| Interrelated neuropsychological and anatomical evidence of hippocampal pathology in the at-risk mental state                                                                          | Hurlemann et al, 2008     | [10] | 36 CHR<br>30 HC                          | 56 %<br>77 %                 | 27.1 ± 5.6<br>28.2 ± 6.4                             | CHR versus HC: left hippocampus, right hippocampus, total hippocampus, whole brain                                                                                                             | 22 |
| Localized gray matter volume reductions in the pars triangularis of the inferior frontal gyrus in individuals at clinical high-risk for psychosis and first episode for schizophrenia | Iwashiro et al, 2012      | [11] | 20 CHR<br>20 HC                          | 50 %<br>50 %                 | 21.4.x ± 3.6<br>22.6 ± 3.8                           | CHR versus HC: total intracranial volume                                                                                                                                                       | 22 |
| Cortical thickness reduction in individuals at ultra-high-risk for psychosis                                                                                                          | Jung et al, 2011          | [12] | 29 CHR<br>29 HC                          | 52 %<br>52 %                 | 22.2 ± 4.3<br>23.2 ± 2.7                             | CHR versus HC: total intracranial volume                                                                                                                                                       | 23 |
| Symptom recovery and relationship to structure corpus callosum in individuals with an at risk mental state                                                                            | Katagiri et al, 2018      | [13] | 37 CHR<br>16 HC                          | 30 %<br>50 %                 | 24.1 ± 7<br>23.2 ± 2.9                               | CHR versus HC: total intracranial volume                                                                                                                                                       | 22 |
| Lack of Evidence for Regional Brain Volume or Cortical Thickness Abnormalities in Youths at Clinical High Risk for Psychosis: Findings From the Longitudinal Youth at Risk Study      | Klauser et al, 2015       | [14] | 69 CHR<br>32 HC                          | 68 %<br>53 %                 | 21.5 ± 3.5<br>23 ± 3.9                               | CHR versus HC: gray matter, bilateral hippocampus, total intracranial volume, white matter                                                                                                     | 24 |
| Abnormal relationships between local and global brain measures in subjects at clinical high risk for psychosis: a pilot study                                                         | Konishi et al, 2018       | [15] | 19 CHR<br>20 HC                          | 68%<br>60 %                  | 20.9 ± 4.3<br>21.4 ± 3.7                             | CHR versus HC: amygdala                                                                                                                                                                        | 26 |
| Neuroanatomical correlates of executive dysfunction in the at-risk mental state for psychosis                                                                                         | Koutselouris et al, 2010  | [16] | 40 CHR<br>30 HC<br>11 CHR-T<br>16 CHR-NT | 68 %<br>60 %<br>82 %<br>67 % | 24.5 ± 5.9<br>26.0 ± 2.7<br>21.6 ± 3.3<br>26.0 ± 6.8 | CHR-T versus CHR-NT: total intracranial volume, white matter                                                                                                                                   | 26 |
| Disease prediction in the at-risk mental state for psychosis using neuroanatomical biomarkers: results from the FePsy study                                                           | Koutselouris et al, 2012a | [17] | 37 CHR<br>22 HC<br>16 CHR-T<br>21 CHR-NT | 59%<br>59%<br>69%<br>52%     | 24.7 ± 6.2<br>23 ± 4.3<br>26.4 ± 6.5<br>23.4 ± 6     | CHR versus HC: Cerebrospinal fluid, total intracranial volume<br><br>CHR-T versus CHR-NT: cerebrospinal fluid, white matter, total intracranial volume                                         | 23 |
| Multivariate patterns of brain-cognition associations relating to vulnerability and clinical outcome in the at-risk mental states for psychosis                                       | Koutselouris et al, 2012b | [18] | 40 CHR<br>30 HC<br>11 CHR-T<br>16 CHR-NT | 68 %<br>60 %<br>82 %<br>69 % | 24.5 ± 5.8<br>26 ± 2.7<br>21.6 ± 3.3<br>26 ± 6.8     | CHR-T versus CHR-NT: grey matter                                                                                                                                                               | 23 |
| Use of neuroanatomical pattern classification to identify subjects in at-risk mental states of psychosis and predict disease transition                                               | Koutsouleris et al, 2009  | [19] | 45 CHR<br>25 HC<br>15 CHR-T<br>18 CHR-NT | 62 %<br>44 %<br>73 %<br>61 % | 25.2 ± 5.9<br>25 ± 5.5<br>25.9 ± 6.7<br>22.4 ± 2.8   | CHR versus HC: cerebrospinal fluid, gray matter, total intracranial volume, white matter<br><br>CHR-T versus CHR-NT: cerebrospinal fluid, gray matter, total intracranial volume, white matter | 23 |

|                                                                                                                                         |                        |      |                                            |                              |                                                       |                                                                                                                                                                                                                      |    |
|-----------------------------------------------------------------------------------------------------------------------------------------|------------------------|------|--------------------------------------------|------------------------------|-------------------------------------------------------|----------------------------------------------------------------------------------------------------------------------------------------------------------------------------------------------------------------------|----|
| Neuroanatomical abnormalities that predate the onset of psychosis: a multicenter study                                                  | Mechelli et al, 2011   | [20] | 48 CHR-T<br>134 CHR-NT                     | 31 %<br>38 %                 | 22.7 ± 4.5<br>23.3 ± 5.3                              | CHR-T versus CHR-NT: gray matter                                                                                                                                                                                     | 27 |
| Structural brain alterations in subjects at high-risk of psychosis: a voxel-based morphometric study                                    | Meisenzahl et al, 2008 | [21] | 40 CHR<br>75 HC                            | 63 %<br>61 %                 | 25 ± 5.6<br>25.1 ± 3.8                                | CHR versus HC: cerebrospinal fluid, total intracranial volume, white matter                                                                                                                                          | 22 |
| Association of Adverse Outcomes With Emotion Processing and Its Neural Substrate in Individuals at Clinical High Risk for Psychosis     | Modinos et al, 2020    | [22] | 213 CHR<br>52 HC<br>44 CHR-T<br>169 CHR-NT | 51 %<br>52 %<br>57 %<br>49 % | 22.9 ± 4.7<br>23.3 ± 4.0<br>22.6 ± 4.7<br>23.0 ± 4.7  | CHR versus HC: total intracranial volume<br><br>CHR-T versus CHR-NT: total intracranial volume                                                                                                                       | 25 |
| Non-reduction in hippocampal volume is associated with higher risk of psychosis                                                         | Phillips et al, 2002   | [23] | 60 CHR<br>139 HC<br>20 CHR-T<br>40 CHR-NT  | 58 %<br>59 %<br>60 %<br>58 % | 20.0 ± 3.3<br>30.1 ± 12.5<br>19.6 ± 3.7<br>20.2 ± 3.1 | CHR-T versus CHR-NT: left hippocampus, right hippocampus, total hippocampus, whole brain                                                                                                                             | 27 |
| Subcortical Brain Volume Abnormalities in Individuals With an At-risk Mental State                                                      | Sabayashi et al, 2020  | [24] | 107 CHR<br>104 HC<br>21 CHR-T<br>72 CHR-NT | 46 %<br>50 %<br>36 %<br>50 % | 21.3 ± 5.4<br>22.6 ± 4.0<br>20.4 ± 4.4<br>21.7 ± 5.8  | CHR-T versus CHR-NT: total intracranial volume, lateral ventricles, left hippocampus, right hippocampus, total hippocampus                                                                                           | 24 |
| Brain TSPO imaging and gray matter volume in schizophrenia patients and in people at ultra high risk of psychosis: An [11C]PBR28 study. | Selvaraj et al, 2018   | [25] | 14 CHR<br>14 HC                            | 50 %<br>71 %                 | 24.3 ± 5.4<br>28.1 ± 8                                | CHR versus HC: gray matter                                                                                                                                                                                           | 26 |
| Altered depth of the olfactory sulcus in ultra high-risk individuals and patients with psychotic disorders                              | Takahashi et al, 2014  | [26] | 135 CHR<br>87 HC<br>52 CHR-T<br>83 CHR-NT  | 58 %<br>63 %<br>58 %<br>58 % | 20.1 ± 3.6<br>26.9 ± 10.1<br>19.6 ± 3.5<br>20.4 ± 3.6 | CHR versus HC: whole brain<br><br>CHR-T versus CHR-NT: total intracranial volume, whole brain                                                                                                                        | 24 |
| Increased pituitary volume in subjects at risk for psychosis and patients with first-episode schizophrenia                              | Takahashi et al, 2013  | [27] | 22 CHR<br>22 HC                            | 50 %<br>50 %                 | 19.1 ± 4.1<br>19.4 ± 4.2                              | CHR versus HC:: total intracranial volume                                                                                                                                                                            | 24 |
| Insular cortex gray matter changes in individuals at ultra-high-risk of developing psychosis                                            | Takahashi et al, 2009a | [28] | 97 CHR<br>55 HC<br>31 CHR-T<br>66 CHR-NT   | 61 %<br>65 %<br>65 %<br>59 % | 19.8 ± 3.4<br>20.8 ± 3.6<br>19.1 ± 3.6<br>20.2 ± 3.3  | CHR versus HC:: total intracranial volume<br><br>CHR-T versus CHR-NT: total intracranial volume                                                                                                                      | 25 |
| Progressive gray matter reduction of the superior temporal gyrus during transition to psychosis                                         | Takahashi et al, 2009b | [29] | 35 CHR<br>22 HC<br>12 CHR-T<br>23 CHR-NT   | 54 %<br>55 %<br>58 %<br>52 % | 20 ± 4.4<br>22 ± 4.7<br>19.5 ± 5.1<br>20.2 ± 4        | CHR versus HC: gray matter, left superior temporal gyrus, right superior temporal gyrus, total superior temporal gyrus, total intracranial volume<br><br>CHR-T versus CHR-NT: gray matter, total intracranial volume | 25 |
| Superior temporal gyrus volume in antipsychotic-naive people at risk of psychosis                                                       | Takahashi et al, 2010  | [30] | 97 CHR<br>42 HC                            | 61 %<br>67 %                 | 19.8 ± 3.4<br>20 ± 2.8                                | CHR versus HC:: left superior temporal gyrus, right superior temporal gyrus, total superior temporal gyrus                                                                                                           | 22 |
| Hippocampal Subregions Across the Psychosis Spectrum                                                                                    | Vargas et al, 2018     | [31] | 61 CHR<br>70 HC                            | 61 %<br>44 %                 | 18.7 ± 1.8<br>18.3 ± 2.7                              | CHR versus HC:: left hippocampus, right hippocampus, total hippocampus, total intracranial volume                                                                                                                    |    |
| Hippocampal subdivision and amygdalar volumes in                                                                                        | Witthaus et al, 2010   | [32] | 29 CHR<br>29 HC                            | 66 %<br>59 %                 | 25.3 ± 4.3<br>25.7 ± 5.2                              | CHR versus HC: amygdala, left                                                                                                                                                                                        | 22 |

|                                                                                                |                      |      |                                         |                              |                                                      |                                                                                                                                                                  |    |
|------------------------------------------------------------------------------------------------|----------------------|------|-----------------------------------------|------------------------------|------------------------------------------------------|------------------------------------------------------------------------------------------------------------------------------------------------------------------|----|
| patients in an at-risk mental state for schizophrenia                                          |                      |      |                                         |                              |                                                      | hippocampus, right hippocampus, total hippocampus, whole brain                                                                                                   |    |
| No evidence for structural brain changes in young adolescents at ultra high risk for psychosis | Ziermans et al, 2009 | [33] | 54 CHR<br>54 HC                         | 61 %<br>50 %                 | 15.8 ± 2.1<br>15.8 ± 1.5                             | CHR versus HC: total intracranial volume, white matter, whole brain                                                                                              | 26 |
| Progressive structural brain changes during development of psychosis                           | Ziermans et al, 2012 | [34] | 43 CHR<br>30 HC<br>8 CHR-T<br>35 CHR-NT | 67 %<br>50 %<br>88 %<br>63 % | 15.6 ± 2.2<br>15.9 ± 1.4<br>16.8 ± 2.2<br>15.3 ± 2.1 | CHR versus HC: gray matter, lateral ventricles<br><br>CHR-T versus CHR-NT: gray matter, lateral ventricles, total intracranial volume, whole brain, white matter | 25 |

Note: CHR indicates Clinical high risk; HC, healthy control; CHR-T, Clinical high risk transitioned to psychosis, CHR-NT, Clinical high risk not transitioned to psychosis; SD, standard deviation.

Figure S1. PRISMA flow chart of manuscript selection

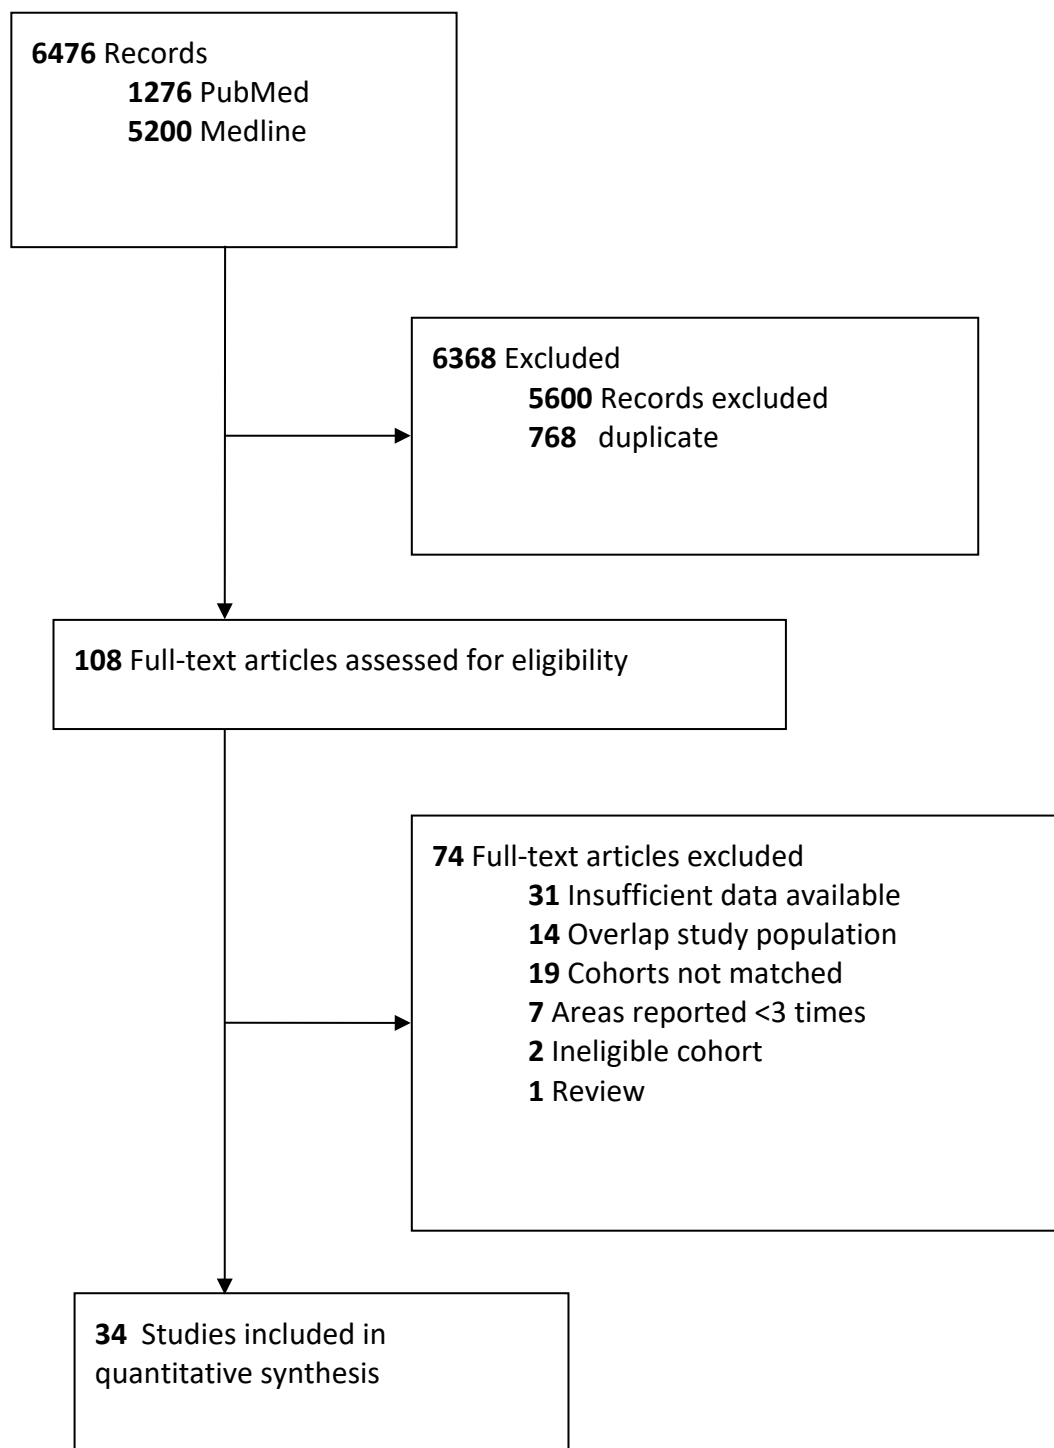

Figure S2 - Forest plot of effect sizes of studies reporting on amygdala in CHR and HC subjects

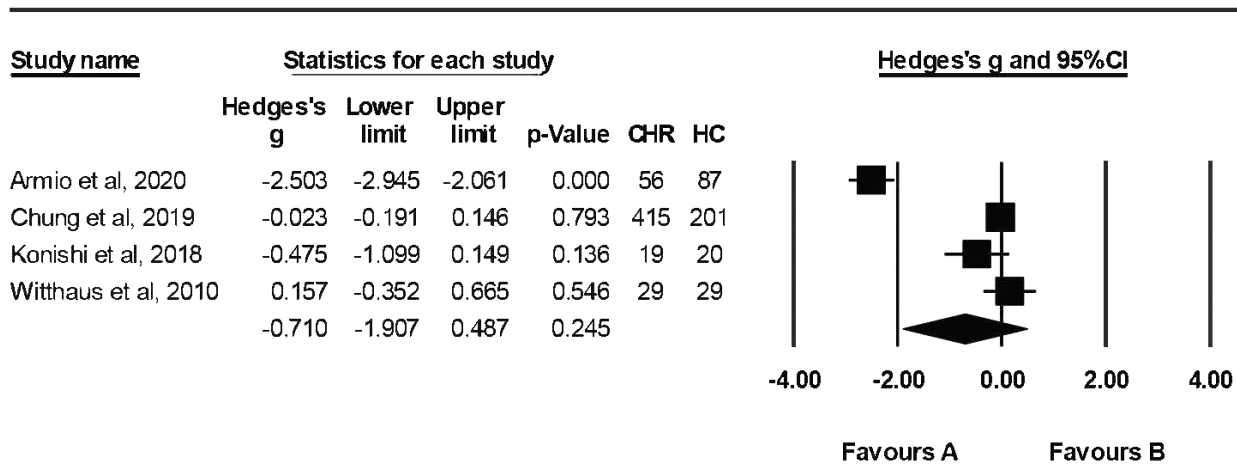

Figure S3 - Forest plot of effect sizes of studies reporting on cerebrospinal fluid volume in CHR and HC subjects

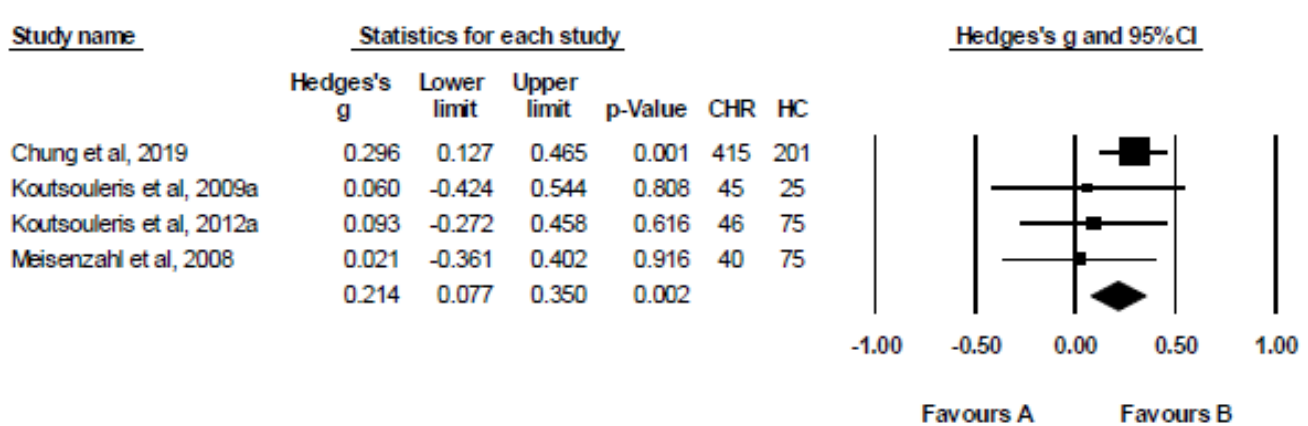

Figure S4 - Forest plot of effect sizes of studies reporting on gray matter volume in CHR and HC subjects

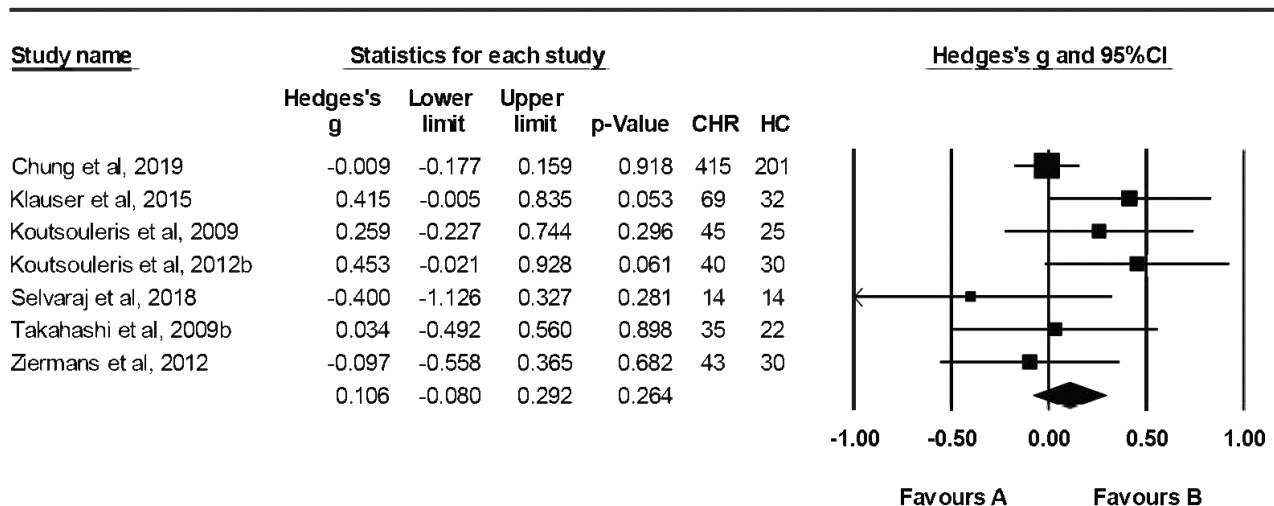



Figure S5 - Forest plot of effect sizes of studies reporting on hippocampus volume in CHR and HC subjects

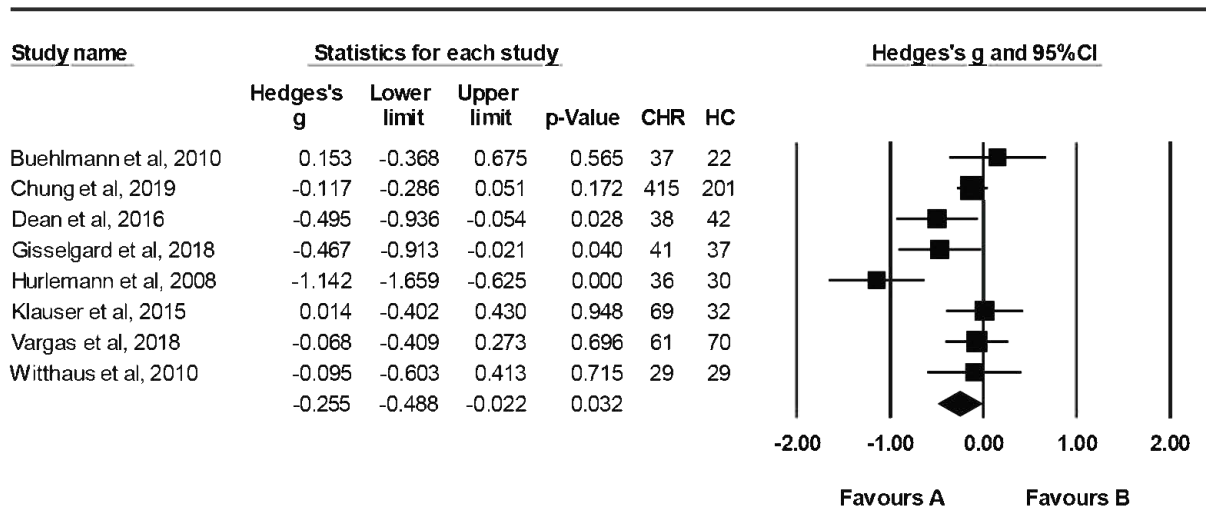

Figure S6 - Forest plot of effect sizes of studies reporting on left hippocampus volume in CHR and HC subjects

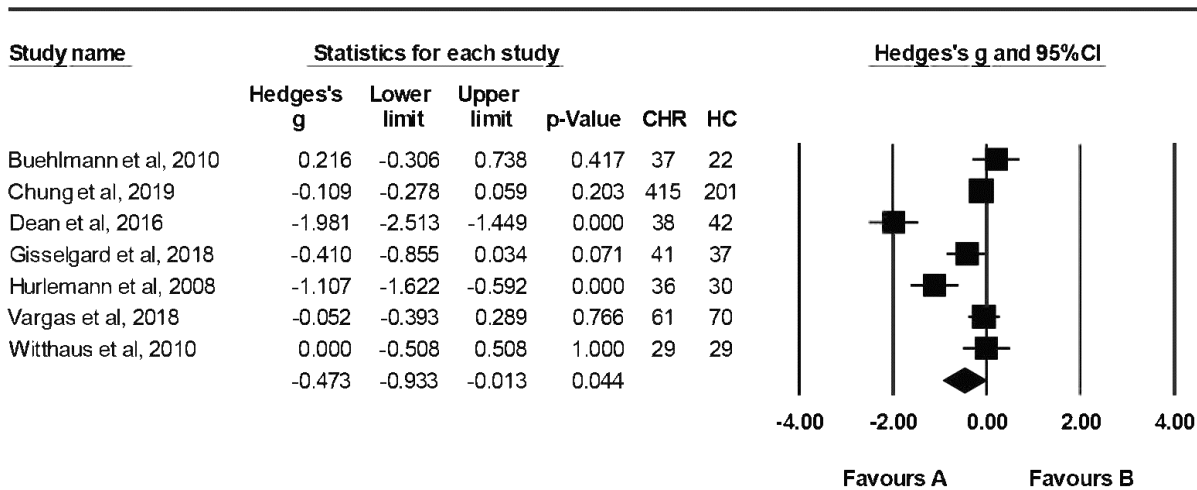

Figure S7 - Forest plot of effect sizes of studies reporting on right hippocampus volume in CHR and HC subjects

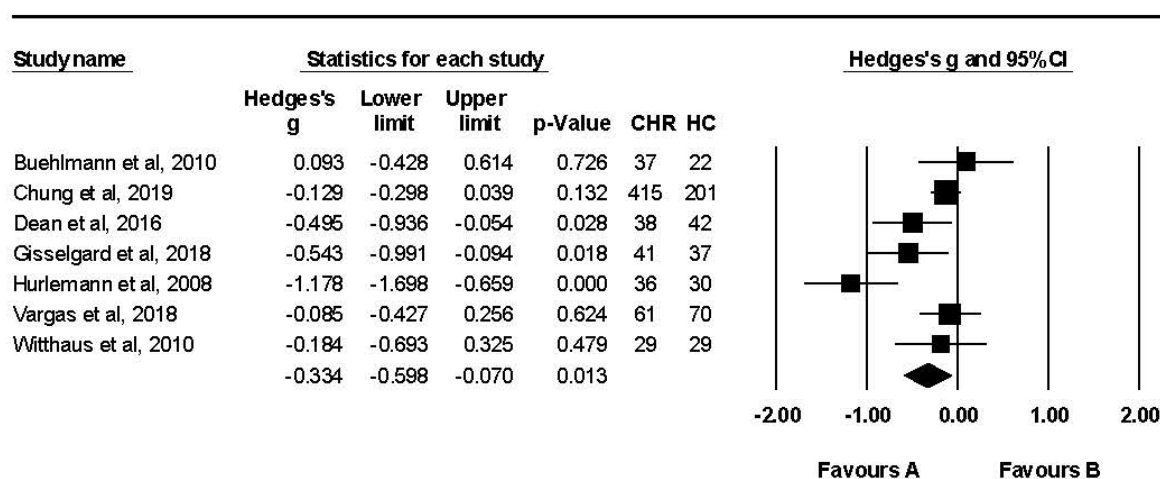

Figure S8 - Forest plot of effect sizes of studies reporting on superior temporal gyrus volume in CHR and HC subjects

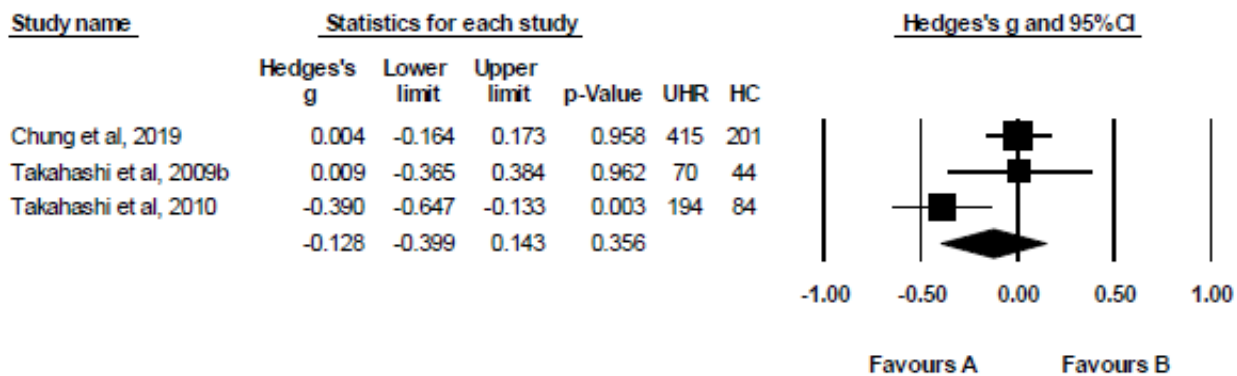

Figure S9 - Forest plot of effect sizes of studies reporting on left superior temporal gyrus volume in CHR and HC subjects

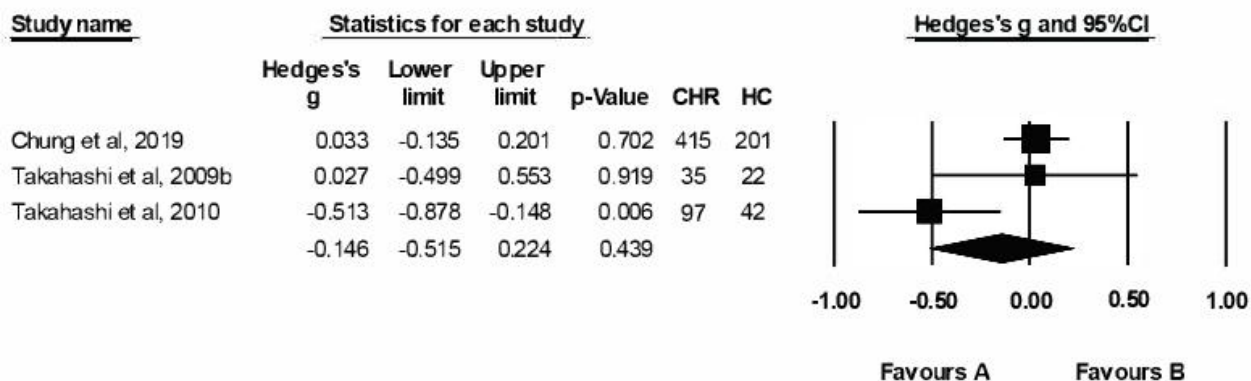

Figure S10 - Forest plot of effect sizes of studies reporting on right superior temporal gyrus volume in CHR and HC subjects

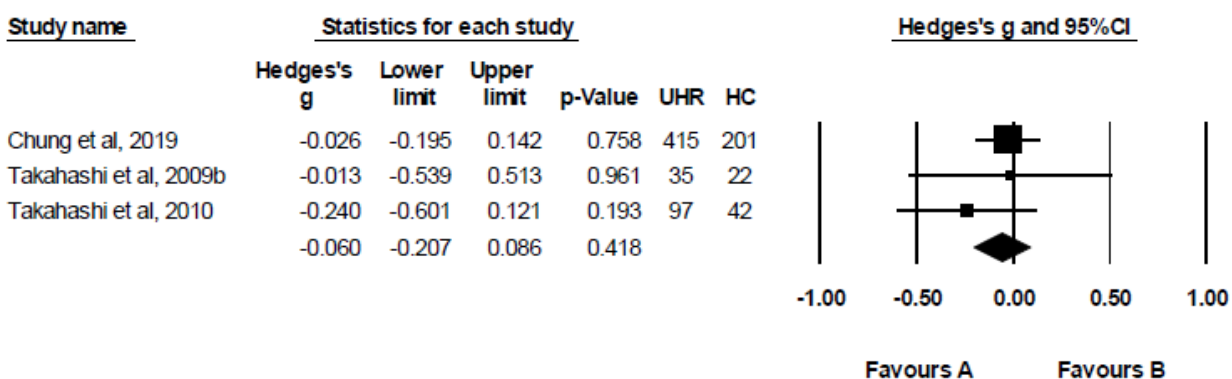

Figure S11 - Forest plot of effect sizes of studies reporting on total intracranial volume in CHR and HC subjects

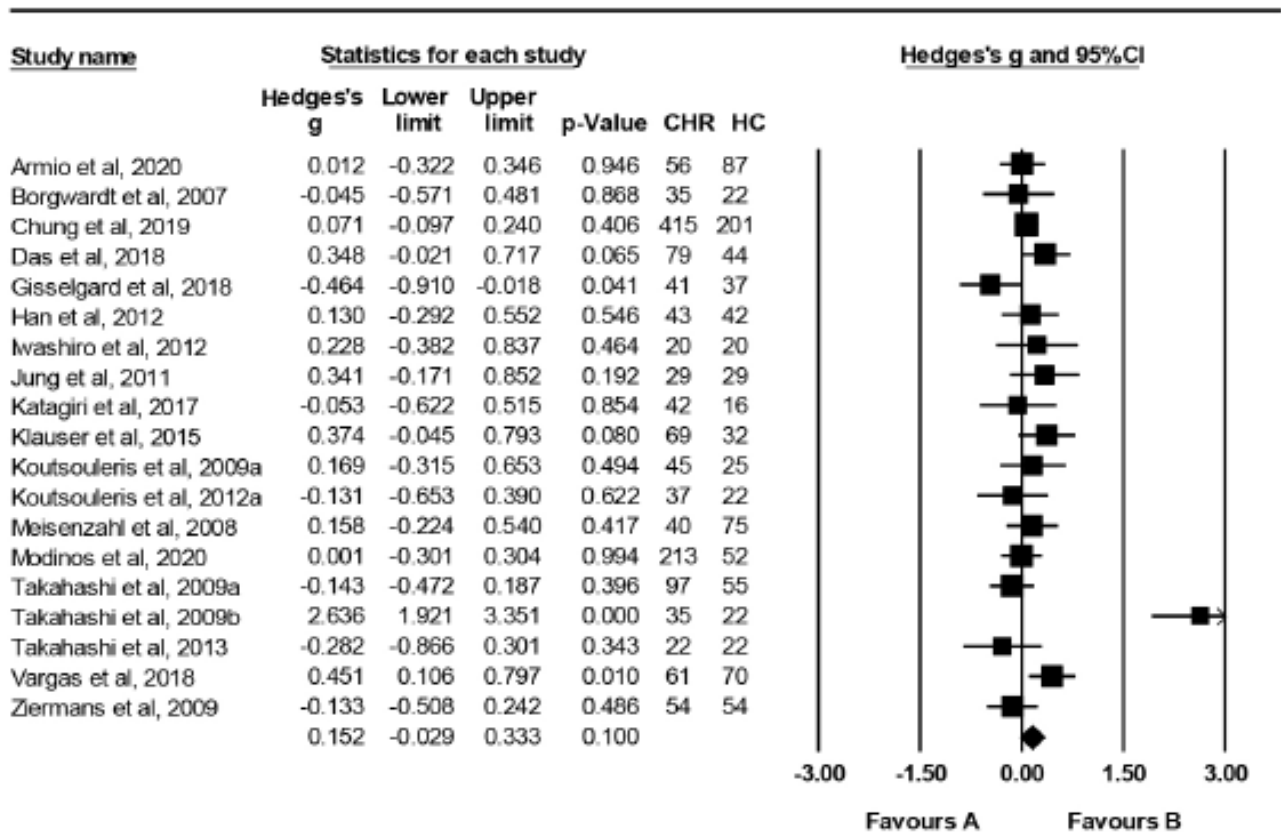

Figure S12 - Forest plot of effect sizes of studies reporting on lateral ventricles volume in CHR and HC subjects

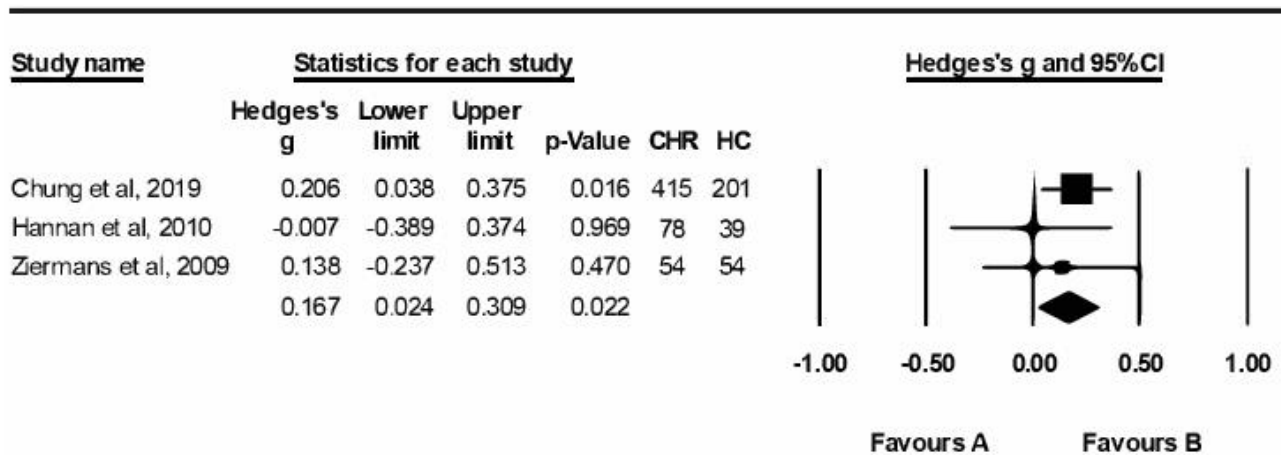

Figure S13 - Forest plot of effect sizes of studies reporting on whole brain volume in CHR and HC subjects

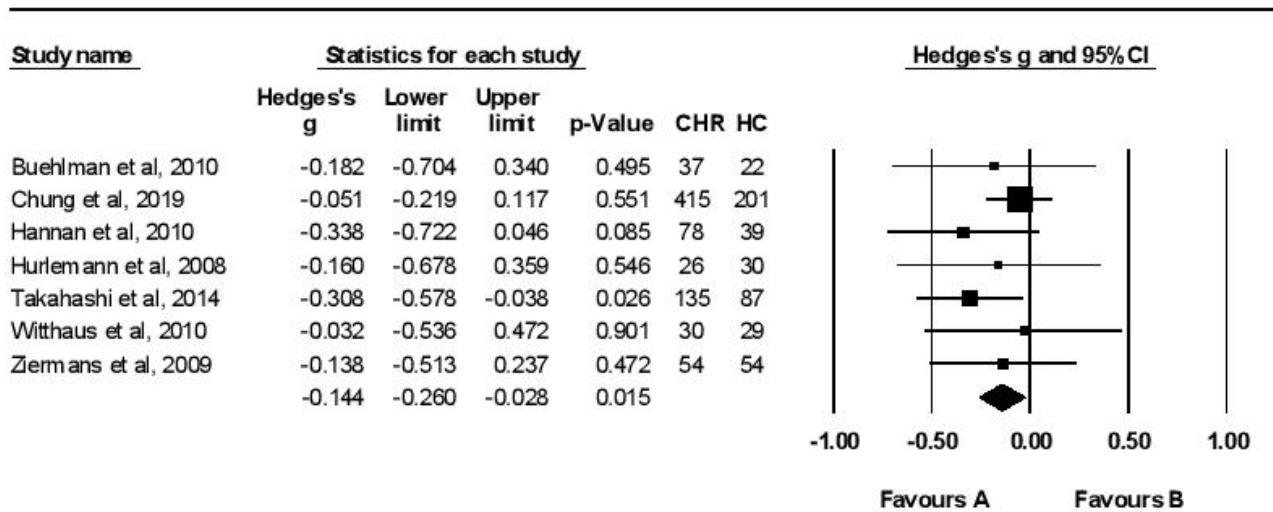

Figure S14 - Forest plot of effect sizes of studies reporting on white brain volume in CHR and HC subjects

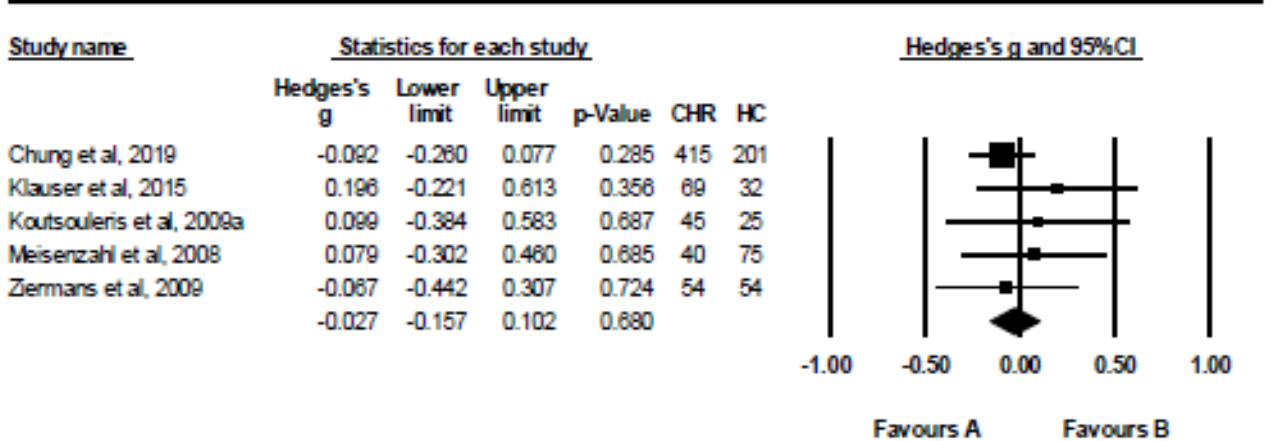

Figure S15 - Forest plot of effect sizes of studies reporting on cerebrospinal fluid volume in CHR-NT and CHR-T subjects

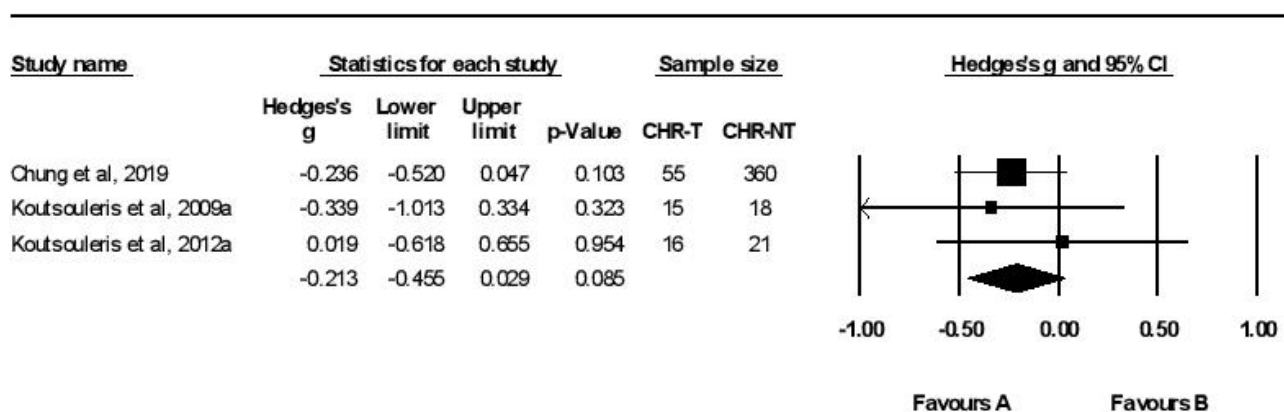

Figure S16 - Forest plot of effect sizes of studies reporting on gray matter volume in CHR-NT and CHR-T subjects

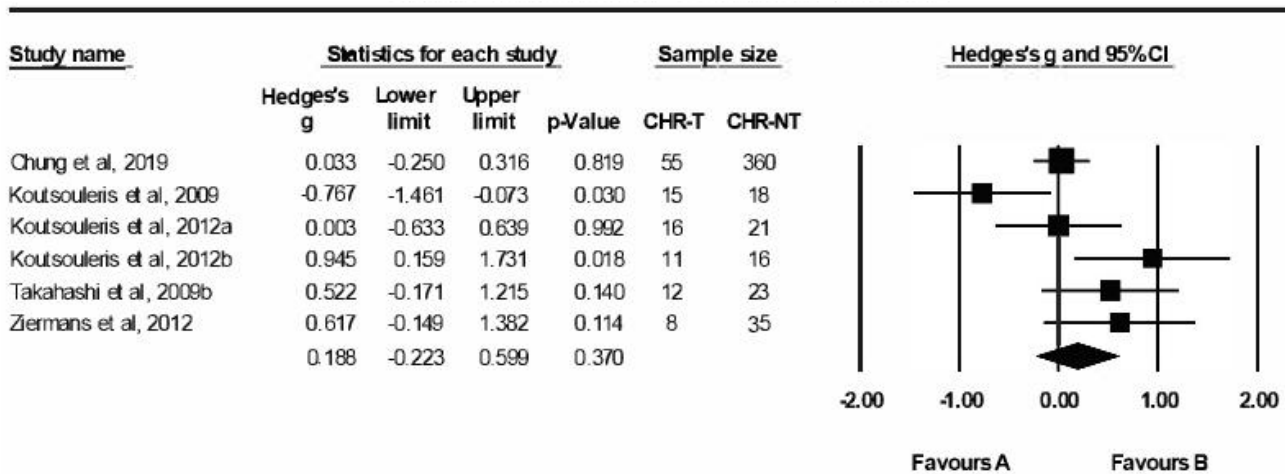

Figure S17 - Forest plot of effect sizes of studies reporting on hippocampus volume in CHR-NT and CHR-T subjects

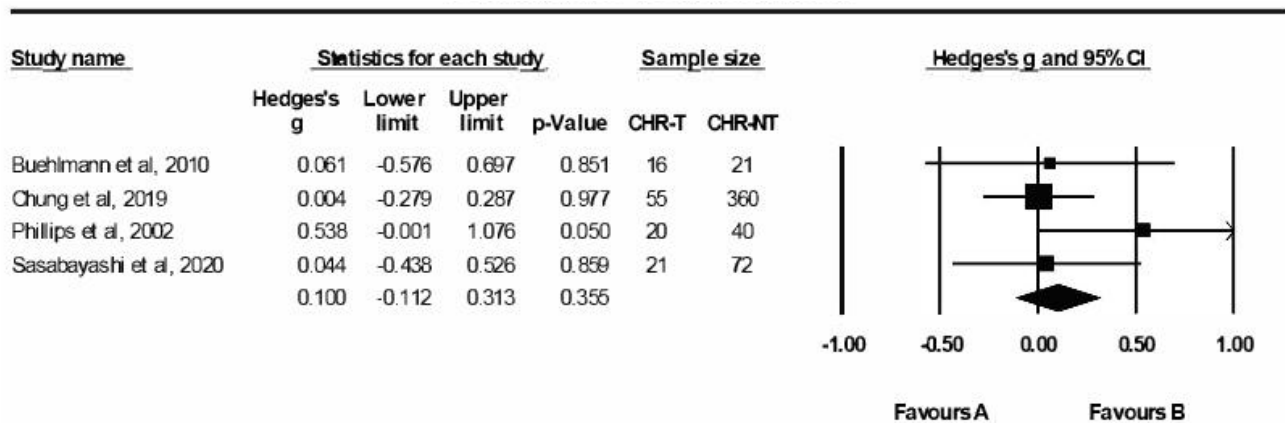

Figure S18 - Forest plot of effect sizes of studies reporting on left hippocampus volume in CHR-NT and CHR-T subjects

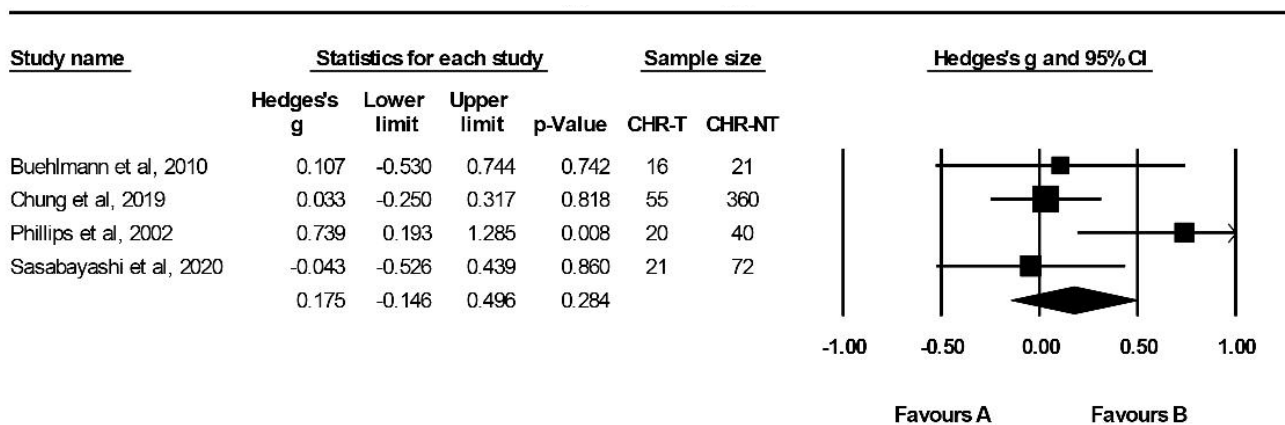

Figure S19 - Forest plot of effect sizes of studies reporting on right hippocampus volume in CHR-NT and CHR-T subjects

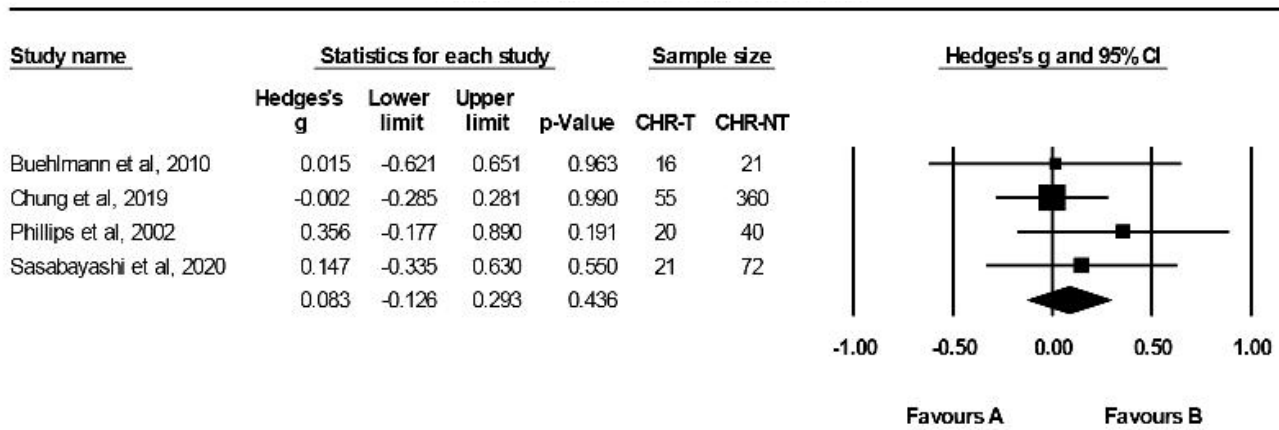

Figure S20 - Forest plot of effect sizes of studies reporting on total intracranial volume in CHR-NT and CHR-T subjects

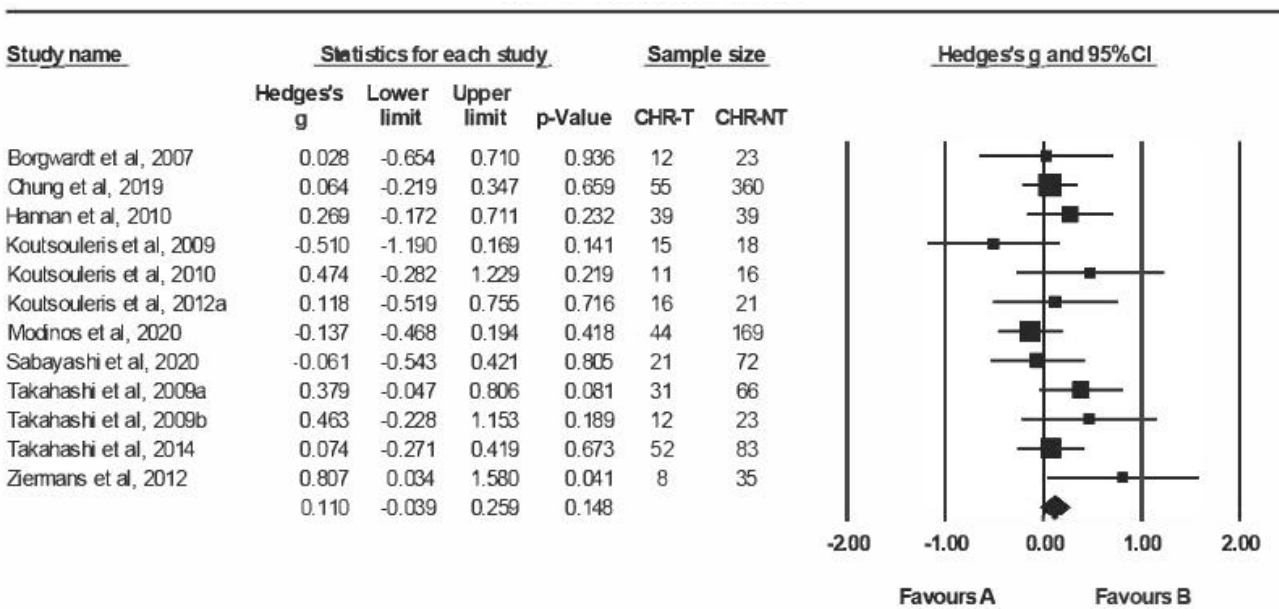

Figure S21 - Forest plot of effect sizes of studies reporting on lateral ventricles volume in CHR-NT and CHR-T subjects

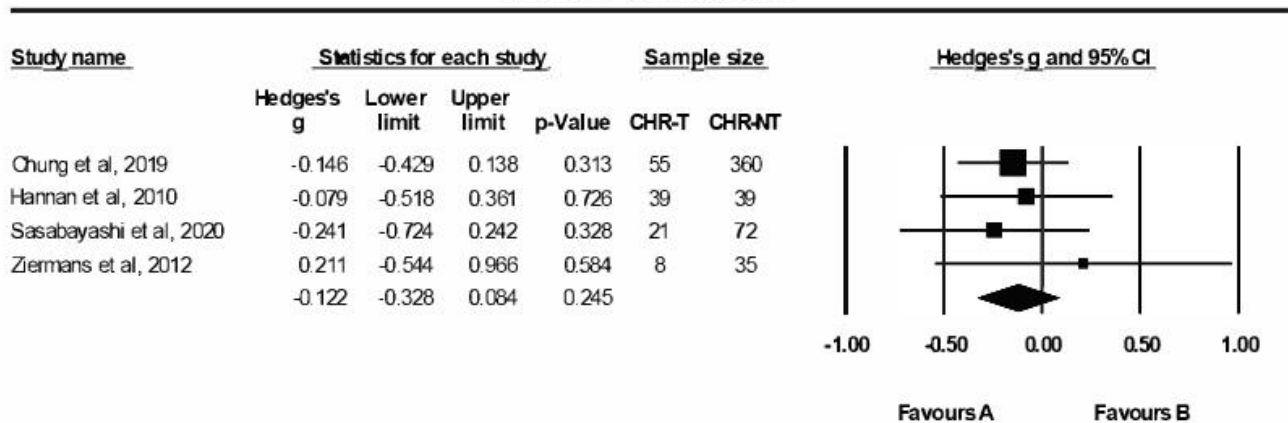

Figure S22 - Forest plot of effect sizes of studies reporting on whole brain volume in CHR-NT and CHR-T subjects

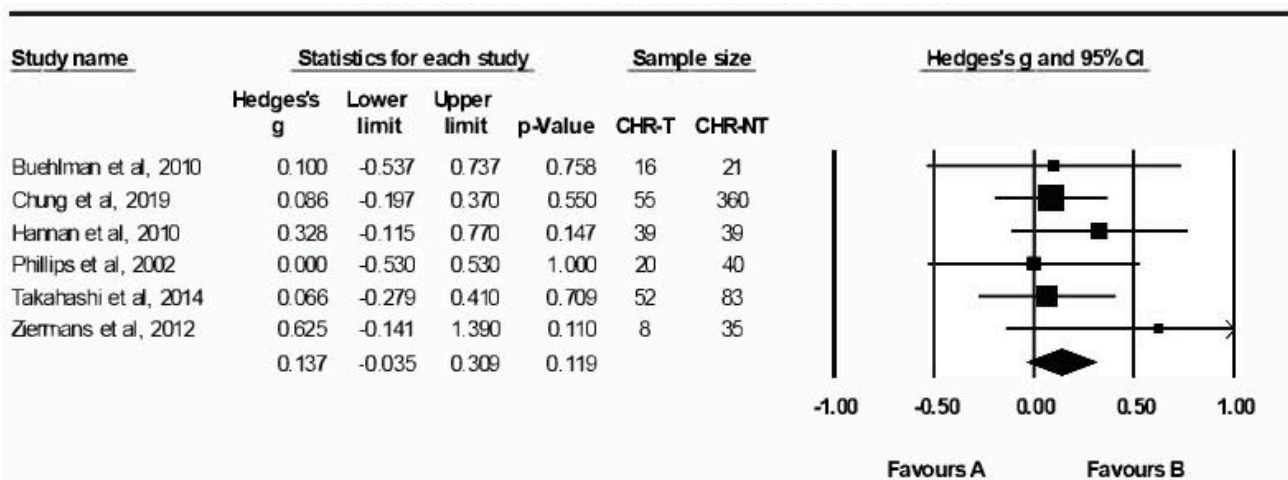

Figure S23 - Forest plot of effect sizes of studies reporting on white matter volume in CHR-NT and CHR-T subjects

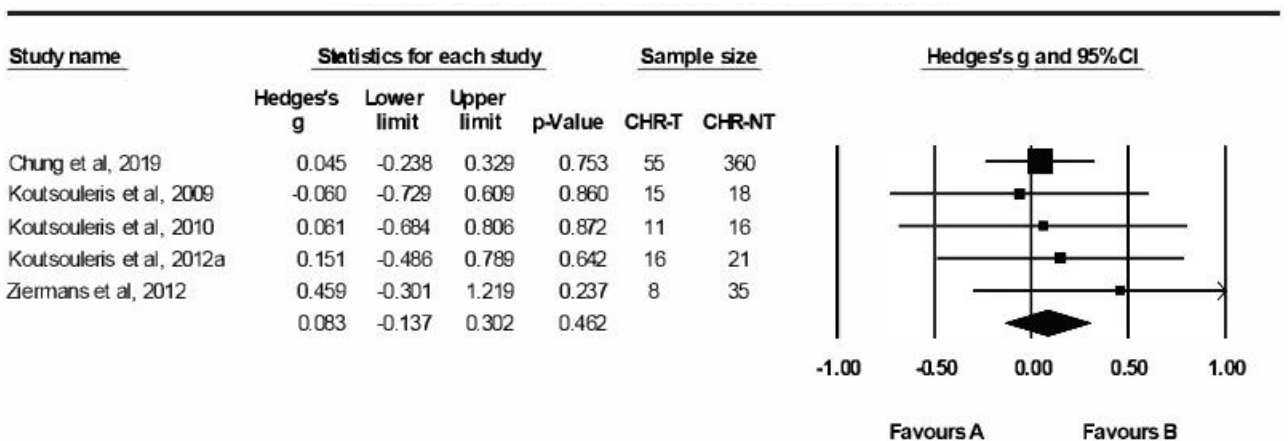



## Supplemental References

1. Armio, R.-L., et al., *Amygdala subnucleus volumes in psychosis high-risk state and first-episode psychosis*. Schizophrenia Research, 2020. 215: p. 284-292.
2. Borgwardt, S.J., et al., *Regional gray matter volume abnormalities in the at risk mental state*. Biological psychiatry, 2007. 61(10): p. 1148-1156.
3. Buehlmann, E., et al., *Hippocampus abnormalities in at risk mental states for psychosis? A cross-sectional high resolution region of interest magnetic resonance imaging study*. Journal of psychiatric research, 2010. 44(7): p. 447-453.
4. Chung, Y., et al., *Cortical abnormalities in youth at clinical high-risk for psychosis: Findings from the NAPLS2 cohort*. NeuroImage: Clinical, 2019. 23: p. 101862.
5. Das, T., et al., *Disorganized gyrification network properties during the transition to psychosis*. Jama Psychiatry, 2018. 75(6): p. 613-622.
6. Dean, D.J., et al., *Hippocampal shape abnormalities predict symptom progression in neuroleptic-free youth at ultrahigh risk for psychosis*. Schizophrenia bulletin, 2016. 42(1): p. 161-169.
7. Gisselgard, J., et al., *Structural and functional alterations in the brain during working memory in medication-naive patients at clinical high-risk for psychosis*. PLoS One, 2018. 13(5): p. e0196289.
8. Han, H.J., et al., *Reduced volume in the anterior internal capsule but its maintained correlation with the frontal gray matter in subjects at ultra-high risk for psychosis*. Psychiatry Research: Neuroimaging, 2012. 204(2-3): p. 82-90.
9. Hannan, K.L., et al., *Caudate nucleus volume in individuals at ultra-high risk of psychosis: a cross-sectional magnetic resonance imaging study*. Psychiatry Research: Neuroimaging, 2010. 182(3): p. 223-230.
10. Hurlemann, R., et al., *Interrelated neuropsychological and anatomical evidence of hippocampal pathology in the at-risk mental state*. Psychological medicine, 2008. 38(6): p. 843-851.
11. Iwashiro, N., et al., *Localized gray matter volume reductions in the pars triangularis of the inferior frontal gyrus in individuals at clinical high-risk for psychosis and first episode for schizophrenia*. Schizophrenia research, 2012. 137(1-3): p. 124-131.
12. Jung, W.H., et al., *Cortical thickness reduction in individuals at ultra-high-risk for psychosis*. Schizophrenia bulletin, 2011. 37(4): p. 839-849.
13. Katagiri, N., et al., *Symptom recovery and relationship to structure of corpus callosum in individuals with an 'at risk mental state'*. Psychiatry Research: Neuroimaging, 2018. 272: p. 1-6.
14. Klauser, P., et al., *Lack of evidence for regional brain volume or cortical thickness abnormalities in youths at clinical high risk for psychosis: findings from the longitudinal youth at risk study*. Schizophrenia bulletin, 2015. 41(6): p. 1285-1293.
15. Konishi, J., et al., *Abnormal relationships between local and global brain measures in subjects at clinical high risk for psychosis: a pilot study*. Brain imaging and behavior, 2018. 12(4): p. 974-988.
16. Koutsouleris, N., et al., *Neuroanatomical correlates of executive dysfunction in the at-risk mental state for psychosis*. Schizophrenia research, 2010. 123(2-3): p. 160-174.
17. Koutsouleris, N., et al., *Disease prediction in the at-risk mental state for psychosis using neuroanatomical biomarkers: results from the FePsy study*. Schizophrenia bulletin, 2012. 38(6): p. 1234-1246.
18. Koutsouleris, N., et al., *Multivariate patterns of brain–cognition associations relating to vulnerability and clinical outcome in the at-risk mental states for psychosis*. Human brain mapping, 2012. 33(9): p. 2104-2124.
19. Koutsouleris, N., et al., *Use of neuroanatomical pattern classification to identify subjects in at-risk mental states of psychosis and predict disease transition*. Archives of general psychiatry, 2009. 66(7): p. 700-712.



20. Mechelli, A., et al., *Neuroanatomical abnormalities that predate the onset of psychosis: a multicenter study*. Archives of general psychiatry, 2011. 68(5): p. 489-495.
21. Meisenzahl, E., et al., *Structural brain alterations in subjects at high-risk of psychosis: a voxel-based morphometric study*. Schizophrenia research, 2008. 102(1-3): p. 150-162.
22. Modinos, G., et al., *Association of Adverse Outcomes With Emotion Processing and Its Neural Substrate in Individuals at Clinical High Risk for Psychosis*. JAMA psychiatry, 2020. 77(2): p. 190-200.
23. Phillips, L.J., et al., *Non-reduction in hippocampal volume is associated with higher risk of psychosis*. Schizophrenia research, 2002. 58(2-3): p. 145-158.
24. Sasabayashi, D., et al., *Subcortical brain volume abnormalities in individuals with an at-risk mental state*. Schizophrenia Bulletin, 2020.
25. Selvaraj, S., et al., *Brain TSPO imaging and gray matter volume in schizophrenia patients and in people at ultra high risk of psychosis: An [11C] PBR28 study*. Schizophrenia research, 2018. 195: p. 206-214.
26. Takahashi, T., et al., *Altered depth of the olfactory sulcus in ultra high-risk individuals and patients with psychotic disorders*. Schizophrenia research, 2014. 153(1-3): p. 18-24.
27. Takahashi, T., et al., *Increased pituitary volume in subjects at risk for psychosis and patients with first-episode schizophrenia*. Psychiatry and clinical neurosciences, 2013. 67(7): p. 540-548.
28. Takahashi, T., et al., *Insular cortex gray matter changes in individuals at ultra-high-risk of developing psychosis*. Schizophrenia research, 2009. 111(1-3): p. 94-102.
29. Takahashi, T., et al., *Progressive gray matter reduction of the superior temporal gyrus during transition to psychosis*. Archives of general psychiatry, 2009. 66(4): p. 366-376.
30. Takahashi, T., et al., *Superior temporal gyrus volume in antipsychotic-naive people at risk of psychosis*. The British Journal of Psychiatry, 2010. 196(3): p. 206-211.
31. Vargas, T., et al., *Hippocampal subregions across the psychosis spectrum*. Schizophrenia bulletin, 2018. 44(5): p. 1091-1099.
32. Witthaus, H., et al., *Hippocampal subdivision and amygdalar volumes in patients in an at-risk mental state for schizophrenia*. Journal of psychiatry & neuroscience: JPN, 2010. 35(1): p. 33.
33. Ziermans, T.B., et al., *No evidence for structural brain changes in young adolescents at ultra high risk for psychosis*. Schizophrenia research, 2009. 112(1-3): p. 1-6.
34. Ziermans, T.B., et al., *Progressive structural brain changes during development of psychosis*. Schizophr Bull, 2012. 38(3): p. 519-30.
